# Supplementary material for: VEGF‐C and Mortality in Patients With Suspected or Known Coronary Artery Disease
Source: PubMed Central journal article supplement — J Am Heart Assoc. 2018 Oct 25;7(21):e010355. doi: 10.1161/JAHA.118.010355 (PMC6404168; doi:10.1161/jaha.118.010355), 2018-10-25
Supplement: JAH3-7-e010355-s001.pdf [file JAH3-7-e010355-s001.pdf]

# **SUPPLEMENTAL MATERIAL**

## APPENDIX

The other members of the ANOX study group are as follows: National Hospital Organization Kyoto Medical Center, Kyoto, Japan: K. Takabayashi, H. Ogawa, Y. Yamashita, Y. Hamatani, Y. An, Y. Tezuka, K. Doi, K. Kashiwabara, M. Murakami, S. Ieda, Y. Ueji, M. Mori, Y. Harada, K. Takahashi, D. Ishikawa, T. Nakayama, H. Oi, T. Hitano, T. Inoue, T. Shinagawa, M. Kimura, and A. Wada; National Hospital Organization Saitama National Hospital, Saitama, Japan: K. Matsumura, T. Katayama, Y. Miyabayashi, T. Sekine, N. Okada, and K. Namiki; National Hospital Organization Kure Medical Center, Kure, Japan: T. Kawamoto, R. Tamura, H. Nishiyama, O. Ichikawa, H. Kinoshita, T. Segawa, K. Yuasa, Y. Kimura, A. Kimura, M. Miura, and Y. Sumitani; National Hospital Organization Yokohama Medical Center, Yokohama, Japan: K. Iwade, Y. Seki, H. Hoshi, F. Mori, and K. Shimizu; National Hospital Organization Sendai Medical Center, Sendai, Japan: G. Ishizuka, N. Ogami, N. Yamaguchi, and H. Fujita; National Hospital Organization Kanazawa Medical Center, Kanazawa, Japan: E. Nakai and J. Arai; National Hospital Organization Hakodate National Hospital, Hakodate, Japan: S. Anzai, H. Hirose, K. Komuro, K. Shimastu, H. Yamada, and K. Inoko; National Hospital Organization Kobe Medical Center, Kobe, Japan: T. Okada, M. Kinugasa, J. Mukai, and A. Suzuki; National Hospital Organization Ehime Medical Center, Toon, Japan: T. Fujita and N. Izumi; National Hospital Organization Hokkaido Medical Center, Sapporo, Japan: H. Okamoto, T. Kaneko, J. Teranishi, M. Satoh, M. Fujita, H. Komatsu, H. Mutou, T. Akagami, T. Honma, A. Kikuchi, M. Kato, K. Otsu, and F. Suzuki; National Hospital Organization Sagami-hara National Hospital, Sagami-hara, Japan: M. Kanna, T. Dejima, M. Nakayama, S. Kikuchi, Y. Okajima, and H. Tanaka; National Hospital Organization Kyushu Medical Center, Fukuoka, Japan: K. Hiyamuta, K. Numaguchi, M. Nishihara, Y. Kuwabara, and S. Tanaka; National Hospital Organization Okayama Medical Center, Okayama, Japan: A. Ogawa and S. Watanabe; National Hospital Organization Tochigi Medical Center, Utsunomiya, Japan: T. Adachi, H. Sakurai, and H. Akutsu.

## Data S1.

### Supplemental Methods

#### Study population

Dyslipidemia was defined as a fasting low-density lipoprotein cholesterol of 140 mg/dL or more, high-density lipoprotein cholesterol of less than 40 mg/dL, triglycerides level of 150 mg/dL or more, or the use of lipid lowering drugs. Hypertension was defined as a clinic systolic blood pressure of 140 mm Hg or more, diastolic blood pressure of 90 mm Hg or more, or the use of anti-hypertensive drugs. Diabetes was defined as a fasting glucose of 126 mg/dL or more, glycosylated hemoglobin of 6.5% or more, or the use of oral hypoglycemic drugs or insulin. The presence of coronary artery disease (CAD), multi-vessel disease, and left main trunk disease was assessed using a modified American Heart Association/American College of Cardiology classification.<sup>1</sup> The severity of CAD was quantified using the Gensini score.<sup>2</sup>

#### Sample collection and biomarker measurement

The secondary predictors were vascular endothelial growth factor (VEGF), soluble vascular VEGF receptor-2 (sVEGFR-2) and two oxidatively modified low-density lipoproteins (LDLs), i.e. the  $\alpha$ 1-antitrypsin/LDL complex (AT-LDL) and serum-amyloid-A/LDL complex (SAA-LDL).

Fasting blood samples for serum were collected from the arterial catheter sheath at the beginning of coronary angiography. Serum (200  $\mu$ L) was treated at 4°C for the measurements of AT-LDL and SAA-LDL, with the use of specific sandwich enzyme-linked immunosorbent assays (ELISA) (Ikagaku [now Health Sciences Research Institute West Japan], Kyoto, Japan).<sup>3,4</sup> The remaining serum was stored at -80°C for a mean of 2 years until being assayed for other biomarkers. The serum levels of VEGF, sVEGFR-2, and high-sensitivity C-reactive protein (hs-CRP) were measured with specific, commercially available ELISA kits according to the manufacturers' instructions (Quantikine, R&D Systems, Minneapolis, MN, for VEGF, and sVEGFR-2; CycLex, MBL, Nagano, Japan for hs-CRP).<sup>5</sup>

The sensitivities of the assays for VEGF, sVEGFR-2, and hs-CRP were 5.0, 4.6, and 28.6 pg/ml, respectively. The inter-/intra-assay coefficients of variation (CV) of ELISA for VEGF, sVEGFR-2, and hs-CRP were <9%/<7%,  $\leq$ 7%/<5%, and <6%/<4%, respectively. The sensitivity of the assay for N-terminal pro-brain natriuretic peptide (NT-proBNP) was 5 pg/mL, and the assay CV at values of the measuring range (5–35,000 pg/mL) was <10%. The sensitivity of the assay for contemporary sensitive cardiac troponin-I (cTnI) was 6 pg/mL, and the assay CV at the 99th percentile reference value of 40 pg/mL (potential range, 20–60 pg/mL) was <10%. The hemoglobin and the hematocrit levels, plasma hemoglobin A1c levels, and fasting serum levels of low-density lipoprotein cholesterol, high-density lipoprotein cholesterol, triglycerides, glucose, creatinine, and uric acid were

measured by routine methods.

### **Statistical analyses**

The baseline clinical characteristics and outcome data are presented as means and standard deviations, medians and interquartile range, or number and proportions, as appropriate. The relationships between the baseline biomarker levels and the outcomes were investigated with the use of Cox proportional hazard regression in three sets of models: age- and sex-adjusted models; models adjusted for age, sex, traditional risk factors (dyslipidemia, hypertension, diabetes, and current smoking), obesity (defined as a body mass index of 25 kg/m<sup>2</sup> or more), chronic kidney disease (CKD) (defined as an estimated glomerular filtration rate of less than 60 mL/min/1.73 m<sup>2</sup>), a history of cardiovascular events (myocardial infarction, stroke, heart failure hospitalization, and coronary revascularization), CAD, multi-vessel or left main trunk disease, statin use, aspirin use, and anti-hypertensive drug use; models adjusted for established risk factors (age, sex, traditional risk factors, obesity, CKD, a history of cardiovascular events, CAD, multi-vessel or left main trunk disease, statin use, aspirin use, and anti-hypertensive drug use), and high levels of NT-proBNP, cTnI, and hs-CRP (for values above the cutoff points determined as previously reported).<sup>6-8</sup>

The necessary number of patients to treat in the present study was estimated on the basis of the association between the sVEGFR-2 level and cardiovascular events in a preliminary cohort study. In that study, a total of 513 patients were followed up over 3 years, and a total of 67 (13%) developed initial cardiovascular events. When the patients were divided into two groups using the optimal cut-off value determined by a receiver operating curve analysis, the event rates were 15.5% and 8.2%, respectively. Therefore, for 99% power and an alpha risk of 1% in the log-rank test for the Kaplan-Meier method, the minimum sample size was calculated as 955 and 1,039 in each group (1,994 in total). We estimated that the data of approximately 20% patients would be incomplete, and thus the target number of patients was 2,500.

**Table S1. Baseline characteristics and incidence of outcomes.**

| Characteristic                          | Overall |            | Quartiles of VEGF-C (pg/mL) |            |                           |            |                           |            |                            |            | P value * | P value for trend † |
|-----------------------------------------|---------|------------|-----------------------------|------------|---------------------------|------------|---------------------------|------------|----------------------------|------------|-----------|---------------------|
|                                         |         |            | Quartile 1<br>(388–2657)    |            | Quartile 2<br>(2658–3543) |            | Quartile 3<br>(3544–4435) |            | Quartile 4<br>(4436–13801) |            |           |                     |
|                                         | No.     | Value      | No.                         | Value      | No.                       | Value      | No.                       | Value      | No.                        | Value      |           |                     |
| Baseline characteristics                |         |            |                             |            |                           |            |                           |            |                            |            |           |                     |
| Previous MI                             | 2418    | 354 (14.6) | 604                         | 112 (18.5) | 605                       | 94 (15.5)  | 604                       | 87 (14.4)  | 605                        | 61 (10.1)  | <0.001    | <0.001              |
| Previous PCI                            | 2418    | 609 (25.2) | 604                         | 171 (28.3) | 605                       | 174 (28.8) | 604                       | 154 (25.5) | 605                        | 110 (18.2) | <0.001    | <0.001              |
| Previous CABG                           | 2418    | 89 (3.7)   | 604                         | 41 (6.8)   | 605                       | 23 (3.8)   | 604                       | 15 (2.5)   | 605                        | 10 (1.7)   | <0.001    | <0.001              |
| Previous CAD (MI, PCI, or CABG)         | 2418    | 701 (29.0) | 604                         | 208 (34.4) | 605                       | 194 (32.1) | 604                       | 176 (29.1) | 605                        | 123 (20.3) | <0.001    | <0.001              |
| Previous CHF hospitalization            | 2418    | 253 (10.5) | 604                         | 99 (16.4)  | 605                       | 59 (9.8)   | 604                       | 52 (8.6)   | 605                        | 43 (7.1)   | <0.001    | <0.001              |
| Previous stroke                         | 2418    | 353 (14.6) | 604                         | 91 (15.1)  | 605                       | 103 (17.0) | 604                       | 85 (14.1)  | 605                        | 74 (12.2)  | 0.121     | 0.074               |
| Family history of cardiovascular events | 2418    | 691 (28.6) | 604                         | 176 (29.1) | 605                       | 155 (25.6) | 604                       | 165 (27.3) | 605                        | 195 (32.2) | 0.068     | 0.181               |
| Chronic kidney disease ‡                | 2418    | 999 (41.3) | 604                         | 336 (55.6) | 605                       | 291 (48.1) | 604                       | 207 (34.3) | 605                        | 165 (27.3) | <0.001    | <0.001              |
| Stage 3a                                |         | 583 (24.1) |                             | 158 (26.2) |                           | 171 (28.3) |                           | 142 (23.5) |                            | 112 (18.5) |           |                     |
| Stage 3b                                |         | 247 (10.2) |                             | 84 (13.9)  |                           | 74 (12.2)  |                           | 49 (8.1)   |                            | 40 (6.6)   |           |                     |
| Stage 4                                 |         | 83 (3.4)   |                             | 34 (5.6)   |                           | 26 (4.3)   |                           | 13 (2.2)   |                            | 10 (1.7)   |           |                     |
| Stage 5                                 |         | 86 (3.6)   |                             | 60 (9.9)   |                           | 20 (3.3)   |                           | 3 (0.5)    |                            | 3 (0.5)    |           |                     |
| Dialysis                                | 2418    | 72 (3.0)   | 604                         | 44 (7.3)   | 605                       | 16 (2.6)   | 604                       | 8 (1.3)    | 605                        | 4 (0.7)    | <0.001    | <0.001              |

**Table S1. Baseline characteristics and incidence of outcomes (continued).**

| Characteristic                            | Overall |                 | Quartiles of VEGF-C (pg/mL) |                 |                           |                 |                           |                 |                            |                | P value * | P value for trend † |
|-------------------------------------------|---------|-----------------|-----------------------------|-----------------|---------------------------|-----------------|---------------------------|-----------------|----------------------------|----------------|-----------|---------------------|
|                                           |         |                 | Quartile 1<br>(388–2657)    |                 | Quartile 2<br>(2658–3543) |                 | Quartile 3<br>(3544–4435) |                 | Quartile 4<br>(4436–13801) |                |           |                     |
|                                           | No.     | Value           | No.                         | Value           | No.                       | Value           | No.                       | Value           | No.                        | Value          |           |                     |
| Gensini score, median (IQR) §             | 2418    | 12.0 (2.5–36.0) | 604                         | 13.0 (3.0–42.0) | 605                       | 14.0 (3.5–36.5) | 604                       | 11.8 (2.5–34.0) | 605                        | 9.5 (0.0–32.5) | <0.001    | <0.001              |
| Systolic blood pressure, mean (SD), mmHg  | 2418    | 127 (18)        | 604                         | 127 (19)        | 605                       | 126 (19)        | 604                       | 126 (17)        | 605                        | 128 (19)       | 0.229     | 0.221               |
| Diastolic blood pressure, mean (SD), mmHg | 2418    | 71 (12)         | 604                         | 68 (12)         | 605                       | 69 (12)         | 604                       | 72 (12)         | 605                        | 73 (13)        | <0.001    | <0.001              |
| Pulse rate, mean (SD), beats per minute   | 2418    | 70 (13)         | 604                         | 71 (13)         | 605                       | 70 (15)         | 604                       | 70 (12)         | 605                        | 71 (13)        | 0.531     | 0.941               |
| LDL-cholesterol, mean (SD), mmHg          | 2366    | 105 (31)        | 590                         | 95 (28)         | 599                       | 102 (31)        | 585                       | 107 (28)        | 592                        | 114 (32)       | <0.001    | <0.001              |
| HDL-cholesterol, mean (SD), mmHg          | 2353    | 54 (16)         | 585                         | 54 (17)         | 592                       | 54 (16)         | 584                       | 56 (17)         | 592                        | 54 (15)        | 0.098     | 0.999               |
| Triglycerides, median (IQR), mg/dL        | 2382    | 111 (81–163)    | 594                         | 99 (72–145)     | 598                       | 113 (79–158)    | 592                       | 109 (83–160)    | 598                        | 131 (92–194)   | <0.001    | <0.001              |
| Fasting glucose, median (IQR), mg/dL      | 2381    | 110 (96–142)    | 594                         | 109 (95–140)    | 600                       | 113 (97–143)    | 590                       | 111 (95–144)    | 597                        | 109 (97–140)   | 0.408     | 0.556               |
| Hemoglobin A1c, median (IQR), %           | 2306    | 6.1 (5.6–7.0)   | 576                         | 6.0 (5.6–6.9)   | 587                       | 6.2 (5.7–7.0)   | 569                       | 6.1 (5.7–7.1)   | 574                        | 6.1 (5.7–7.1)  | 0.015     | 0.008               |
| Creatinine, median (IQR), mg/dL           | 2418    | 0.9 (0.7–1.0)   | 604                         | 0.9 (0.7–1.2)   | 605                       | 0.9 (0.7–1.1)   | 604                       | 0.8 (0.7–1.0)   | 605                        | 0.8 (0.7–0.9)  | <0.001    | <0.001              |

**Table S1. Baseline characteristics and incidence of outcomes (continued).**

| Characteristic                                       | Overall |                | Quartiles of VEGF-C (pg/mL) |                |                           |                |                           |                |                            |                | P value * | P value for trend † |
|------------------------------------------------------|---------|----------------|-----------------------------|----------------|---------------------------|----------------|---------------------------|----------------|----------------------------|----------------|-----------|---------------------|
|                                                      |         |                | Quartile 1<br>(388–2657)    |                | Quartile 2<br>(2658–3543) |                | Quartile 3<br>(3544–4435) |                | Quartile 4<br>(4436–13801) |                |           |                     |
|                                                      | No.     | Value          | No.                         | Value          | No.                       | Value          | No.                       | Value          | No.                        | Value          |           |                     |
| Estimated GFR, mean (SD), ml/min/1.73 m <sup>2</sup> | 2418    | 63 (22)        | 604                         | 55 (25)        | 605                       | 60 (21)        | 604                       | 67 (20)        | 605                        | 71 (20)        | <0.001    | <0.001              |
| Hemoglobin, mean (SD), g/dL                          | 2412    | 13.0 (1.8)     | 602                         | 12.1 (2.0)     | 604                       | 12.8 (1.8)     | 602                       | 13.3 (1.5)     | 604                        | 13.7 (1.6)     | <0.001    | <0.001              |
| Hematocrit, mean (SD), %                             | 2411    | 39.0 (5.3)     | 602                         | 36.5 (5.8)     | 604                       | 38.4 (5.1)     | 602                       | 40.0 (4.4)     | 603                        | 41.1 (4.8)     | <0.001    | <0.001              |
| Uric acid, mean (SD), mg/dL                          | 2347    | 5.9 (1.7)      | 579                         | 6.0 (1.8)      | 593                       | 6.0 (1.6)      | 586                       | 5.8 (1.6)      | 589                        | 5.9 (1.7)      | 0.129     | 0.191               |
| VEGF, median (IQR), pg/mL                            | 2418    | 248 (139–400)  | 604                         | 151 (54–284)   | 605                       | 255 (156–390)  | 604                       | 279 (160–436)  | 605                        | 319 (190–489)  | <0.001    | <0.001              |
| sVEGFR-2, mean (SD), pg/mL                           | 2418    | 6571 (1455)    | 604                         | 6172 (1457)    | 605                       | 6380 (1330)    | 604                       | 6660 (1397)    | 605                        | 7074 (1475)    | <0.001    | <0.001              |
| SAA-LDL, median (IQR), µg/mL                         | 2416    | 8.6 (5.6–15.0) | 603                         | 9.0 (5.1–15.9) | 605                       | 8.0 (5.8–16.0) | 603                       | 8.0 (5.1–13.6) | 605                        | 9.0 (6.0–16.0) | 0.031     | 0.206               |
| AT-LDL, median (IQR), µg/mL                          | 2416    | 1.8 (1.5–2.3)  | 603                         | 2.0 (1.5–2.5)  | 605                       | 1.8 (1.5–2.3)  | 603                       | 1.8 (1.5–2.2)  | 605                        | 1.8 (1.5–2.2)  | 0.004     | <0.001              |
| Anti-hypertensive drug use                           | 2418    | 1967 (81.3)    | 604                         | 505 (83.6)     | 605                       | 502 (83.0)     | 604                       | 473 (78.3)     | 605                        | 487 (80.5)     | 0.070     | 0.048               |
| RASI                                                 | 2418    | 1432 (59.2)    | 604                         | 374 (61.9)     | 605                       | 381 (63.0)     | 604                       | 330 (54.6)     | 605                        | 347 (57.4)     | 0.009     | 0.014               |
| ACEI                                                 | 2418    | 388 (16.0)     | 604                         | 124 (20.5)     | 605                       | 89 (14.7)      | 604                       | 91 (15.1)      | 605                        | 84 (13.9)      | 0.006     | 0.003               |
| ARB                                                  | 2418    | 1103 (45.6)    | 604                         | 273 (45.2)     | 605                       | 308 (50.9)     | 604                       | 249 (41.2)     | 605                        | 273 (45.1)     | 0.009     | 0.274               |
| β-blocker                                            | 2418    | 715 (29.6)     | 604                         | 207 (34.3)     | 605                       | 176 (29.1)     | 604                       | 159 (26.3)     | 605                        | 173 (28.6)     | 0.020     | 0.017               |
| Any lipid-lowering drug use                          | 2418    | 1382 (57.2)    | 604                         | 327 (54.1)     | 605                       | 364 (60.2)     | 604                       | 343 (56.8)     | 605                        | 348 (57.5)     | 0.208     | 0.453               |
| Any hypoglycemic drug use                            | 2418    | 760 (31.4)     | 604                         | 189 (31.3)     | 605                       | 201 (33.2)     | 604                       | 185 (30.6)     | 605                        | 185 (30.6)     | 0.731     | 0.575               |
| Oral hypoglycemic drugs                              | 2418    | 603 (24.9)     | 604                         | 149 (24.7)     | 605                       | 155 (25.6)     | 604                       | 148 (24.5)     | 605                        | 151 (25.0)     | 0.972     | 0.975               |

**Table S1. Baseline characteristics and incidence of outcomes (continued).**

| Characteristic                                | Overall |             | Quartiles of VEGF-C (pg/mL) |            |                           |            |                           |            |                            |            | P value * | P value for trend † |
|-----------------------------------------------|---------|-------------|-----------------------------|------------|---------------------------|------------|---------------------------|------------|----------------------------|------------|-----------|---------------------|
|                                               |         |             | Quartile 1<br>(388–2657)    |            | Quartile 2<br>(2658–3543) |            | Quartile 3<br>(3544–4435) |            | Quartile 4<br>(4436–13801) |            |           |                     |
|                                               | No.     | Value       | No.                         | Value      | No.                       | Value      | No.                       | Value      | No.                        | Value      |           |                     |
| Insulin                                       | 2418    | 285 (11.8)  | 604                         | 68 (11.3)  | 605                       | 81 (13.4)  | 604                       | 70 (11.6)  | 605                        | 66 (10.9)  | 0.547     | 0.627               |
| Any anti-platelet drug use                    | 2418    | 1509 (62.4) | 604                         | 367 (60.8) | 605                       | 398 (65.8) | 604                       | 381 (63.1) | 605                        | 363 (60.0) | 0.154     | 0.570               |
| Any anti-coagulant drugs                      | 2418    | 383 (15.8)  | 604                         | 134 (22.2) | 605                       | 96 (15.9)  | 604                       | 90 (14.9)  | 605                        | 63 (10.4)  | <0.001    | <0.001              |
| Warfarin                                      | 2418    | 332 (13.7)  | 604                         | 115 (19.0) | 605                       | 84 (13.9)  | 604                       | 82 (13.6)  | 605                        | 51 (8.4)   | <0.001    | <0.001              |
| Incidence of events, no. (/1000 person-years) |         |             |                             |            |                           |            |                           |            |                            |            |           |                     |
| All-cause death                               | 2418    | 254 (37.5)  | 604                         | 118 (73.4) | 605                       | 58 (33.9)  | 604                       | 42 (24.4)  | 605                        | 36 (20.7)  | –         | –                   |
| Cardiovascular death                          | 2418    | 88 (13.0)   | 604                         | 46 (28.6)  | 605                       | 16 (9.3)   | 604                       | 10 (5.8)   | 605                        | 16 (9.2)   | –         | –                   |
| Myocardial infarction                         | 2418    | 21 (3.1)    | 604                         | 8 (5.0)    | 605                       | 5 (3.0)    | 604                       | 3 (1.8)    | 605                        | 5 (2.9)    | –         | –                   |
| Stroke                                        | 2418    | 69 (10.3)   | 604                         | 22 (13.9)  | 605                       | 16 (9.5)   | 604                       | 17 (10.0)  | 605                        | 14 (8.2)   | –         | –                   |
| First MACE                                    | 2418    | 165 (24.7)  | 604                         | 68 (42.9)  | 605                       | 36 (21.4)  | 604                       | 29 (17.1)  | 605                        | 32 (18.7)  | –         | –                   |

VEGF-C, vascular endothelial growth factor-C; MI, myocardial infarction; PCI, percutaneous coronary intervention; CABG, coronary artery bypass grafting; CAD, coronary artery disease; CHF, congestive heart failure; IQR, interquartile range; SD, standard deviation; LDL, low-density lipoprotein; HDL, high-density lipoprotein; GFR, glomerular filtration rate; VEGF, vascular endothelial growth factor; sVEGFR-2, soluble vascular endothelial growth factor receptor-2; SAA-LDL, serum-amyloid-A/low-density-lipoprotein complex; AT-LDL,  $\alpha$ 1-antitrypsin/low-density-lipoprotein complex; RASI, renin angiotensin system inhibitors; ACEI, angiotensin converting enzyme inhibitors; ARB, angiotensin receptor blockers; MACE, major adverse cardiovascular event.



Values are expressed as number (percentage) unless otherwise indicated.

\* The P value is for the comparison between groups, and is based on the chi-square test of independence for categorical variables, and the analysis of variance or Kruskal-Wallis for continuous variables.

† For continuous variables, the test for trend is based on linear contrast test with analysis of variance or Jonckheere-Terpstra test. For categorical variables, the test is based on the Cochran–Armitage trend test.

‡ Chronic kidney disease is defined as an estimated GFR of less than 60 ml/min/1.73 m<sup>2</sup> of body surface area. Estimated GFR of stages 3a, 3b, 4, and 5 are as follows: stage 3a, 45–59 ml/min/1.73 m<sup>2</sup>; stage 3b, 30–44 ml/min/1.73 m<sup>2</sup>; stage 4, 15–29 ml/min/1.73 m<sup>2</sup>; stage 5, ≤14 ml/min/1.73 m<sup>2</sup>.

§The Gensini score represents the angiographic severity of coronary artery disease employing a nonlinear points system for degree of luminal narrowing.

|| The MACE is defined as a composite of cardiovascular death, nonfatal myocardial infarction, and nonfatal stroke.

**Table S2. Hazard ratios for all-cause death, cardiovascular death, and a major adverse cardiovascular event according to biomarker levels.**

| Biomarker and Criterion            | Unadjusted       |         | Model 1          |         | Model 2          |         | Model 3          |         |
|------------------------------------|------------------|---------|------------------|---------|------------------|---------|------------------|---------|
|                                    | HR (95% CI)      | P value |
| All-cause Death                    |                  |         |                  |         |                  |         |                  |         |
| VEGF                               | 1.12 (1.01-1.24) | 0.033   | 1.14 (1.03-1.26) | 0.011   | 1.14 (1.03-1.26) | 0.012   | 1.09 (0.98-1.21) | 0.118   |
| sVEGFR-2                           | 0.79 (0.70-0.90) | <0.001  | 0.95 (0.82-1.09) | 0.445   | 0.95 (0.83-1.10) | 0.507   | 0.93 (0.81-1.06) | 0.281   |
| SAA-LDL                            | 1.15 (1.07-1.24) | <0.001  | 1.14 (1.05-1.23) | <0.001  | 1.11 (1.02-1.20) | 0.012   | 1.04 (0.96-1.14) | 0.347   |
| AT-LDL                             | 1.30 (1.17-1.45) | <0.001  | 1.25 (1.12-1.39) | <0.001  | 1.24 (1.11-1.38) | <0.001  | 1.17 (1.04-1.31) | 0.007   |
| Cardiovascular Death               |                  |         |                  |         |                  |         |                  |         |
| VEGF                               | 1.05 (0.86-1.27) | 0.661   | 1.07 (0.88-1.29) | 0.519   | 1.06 (0.87-1.29) | 0.549   | 1.02 (0.83-1.25) | 0.845   |
| sVEGFR-2                           | 0.78 (0.62-0.97) | 0.025   | 0.89 (0.70-1.13) | 0.352   | 0.92 (0.73-1.17) | 0.507   | 0.92 (0.73-1.15) | 0.455   |
| SAA-LDL                            | 1.12 (0.97-1.29) | 0.125   | 1.11 (0.96-1.28) | 0.156   | 1.07 (0.92-1.23) | 0.376   | 1.00 (0.85-1.18) | 0.996   |
| AT-LDL                             | 1.20 (0.99-1.45) | 0.058   | 1.15 (0.95-1.40) | 0.144   | 1.12 (0.92-1.36) | 0.254   | 1.02 (0.84-1.24) | 0.843   |
| Major adverse cardiovascular event |                  |         |                  |         |                  |         |                  |         |
| VEGF                               | 1.08 (0.94-1.24) | 0.255   | 1.09 (0.96-1.25) | 0.185   | 1.09 (0.95-1.25) | 0.217   | 1.06 (0.92-1.22) | 0.428   |
| sVEGFR-2                           | 0.91 (0.78-1.07) | 0.252   | 1.00 (0.85-1.19) | 0.981   | 1.01 (0.85-1.19) | 0.919   | 0.99 (0.84-1.17) | 0.933   |
| SAA-LDL                            | 1.09 (0.97-1.22) | 0.156   | 1.08 (0.96-1.22) | 0.178   | 1.05 (0.93-1.18) | 0.427   | 0.99 (0.87-1.13) | 0.901   |
| AT-LDL                             | 1.17 (1.02-1.35) | 0.026   | 1.14 (0.99-1.32) | 0.064   | 1.13 (0.98-1.31) | 0.094   | 1.06 (0.91-1.23) | 0.445   |

HR, hazard ratio; CI, confidence interval; SD, standard deviation; VEGF, vascular endothelial growth factor; sVEGFR-2, soluble vascular endothelial growth factor receptor-2; SAA-LDL, serum-amyloid-A/low-density-lipoprotein complex; AT-LDL,  $\alpha$ 1-antitrypsin/low-density-lipoprotein complex. Values (for 1-standard deviation increase) were calculated with the use of multivariable Cox regression analyses. Data were adjusted for the following variables: model-1, age and sex; model-2, model-1 plus dyslipidemia, hypertension, diabetes, current smoker, obesity, previous cardiovascular events, chronic kidney disease, coronary artery disease, multi-vessel or left main trunk disease, statin use, aspirin use, and anti-hypertensive drug use; model-3, model-2 plus N-terminal pro-brain natriuretic peptide (>75th percentile), contemporary sensitive cardiac troponin I (>75th percentile), and high-sensitivity C-reactive protein (>1.0 g/mL).

## Supplemental References:

1. Austen WG, Edwards JE, Frye RL, Gensini GG, Gott VL, Griffith LS, McGoon DC, Murphy ML, Roe BB. A reporting system on patients evaluated for coronary artery disease. Report of the Ad Hoc Committee for Grading of Coronary Artery Disease, Council on Cardiovascular Surgery, American Heart Association. *Circulation*. 1975;51:5-40.
2. Gensini GG. A more meaningful scoring system for determining the severity of coronary heart disease. *Am J Cardiol*. 1983; 51:606.
3. Wada H, Ura S, Satoh-Asahara N, Kitaoka S, Mashiba S, Akao M, Abe M, Ono K, Morimoto T, Fujita M, Shimatsu A, Takahashi Y, Hasegawa K.  $\alpha$ 1-Antitrypsin low-density-lipoprotein serves as a marker of smoking-specific oxidative stress. *J Atheroscler Thromb*. 2012;19:47-58.
4. Kotani K, Satoh N, Kato Y, Araki R, Koyama K, Okajima T, Tanabe M, Oishi M, Yamakage H, Yamada K, Hattori M, Shimatsu A; Japan Obesity and Metabolic Syndrome Study Group. A novel oxidized low-density lipoprotein marker, serum amyloid A-LDL, is associated with obesity and the metabolic syndrome. *Atherosclerosis*. 2009;204:526-531.
5. Wada H, Ura S, Kitaoka S, Satoh-Asahara N, Horie T, Ono K, Takaya T, Takanabe-Mori R, Akao M, Abe M, Morimoto T, Murayama T, Yokode M, Fujita M, Shimatsu A, Hasegawa K. Distinct characteristics of circulating vascular endothelial growth factor-A and C levels in human subjects. *PLoS ONE*. 2011;6:e29351.
6. Kragelund C, Grønning B, Køber L, Hildebrandt P, Steffensen R. N-terminal pro-B-type natriuretic peptide and long-term mortality in stable coronary heart disease. *N Engl J Med*. 2005;352:666-675.
7. Omland T, Pfeffer MA, Solomon SD, de Lemos JA, Røsjø H, Šaltytė Benth J, Maggioni A, Domanski MJ, Rouleau JL, Sabatine MS, Braunwald E; PEACE Investigators. Prognostic value of cardiac troponin I measured with a highly sensitive assay in patients with stable coronary artery disease. *J Am Coll Cardiol*. 2013;61:1240–1249.
8. Sabatine MS, Morrow DA, Jablonski KA, Rice MM, Warnica JW, Domanski MJ, Hsia J, Gersh BJ, Rifai N, Ridker PM, Pfeffer MA, Braunwald E; PEACE Investigators. Prognostic significance of the Centers for Disease Control/American Heart Association high-sensitivity C-reactive protein cut points for cardiovascular and other outcomes in patients with stable coronary artery disease. *Circulation*. 2007;115:1528-1536.
